# Supplementary material
Source: PubMed Central journal article supplement (PMC6650338)

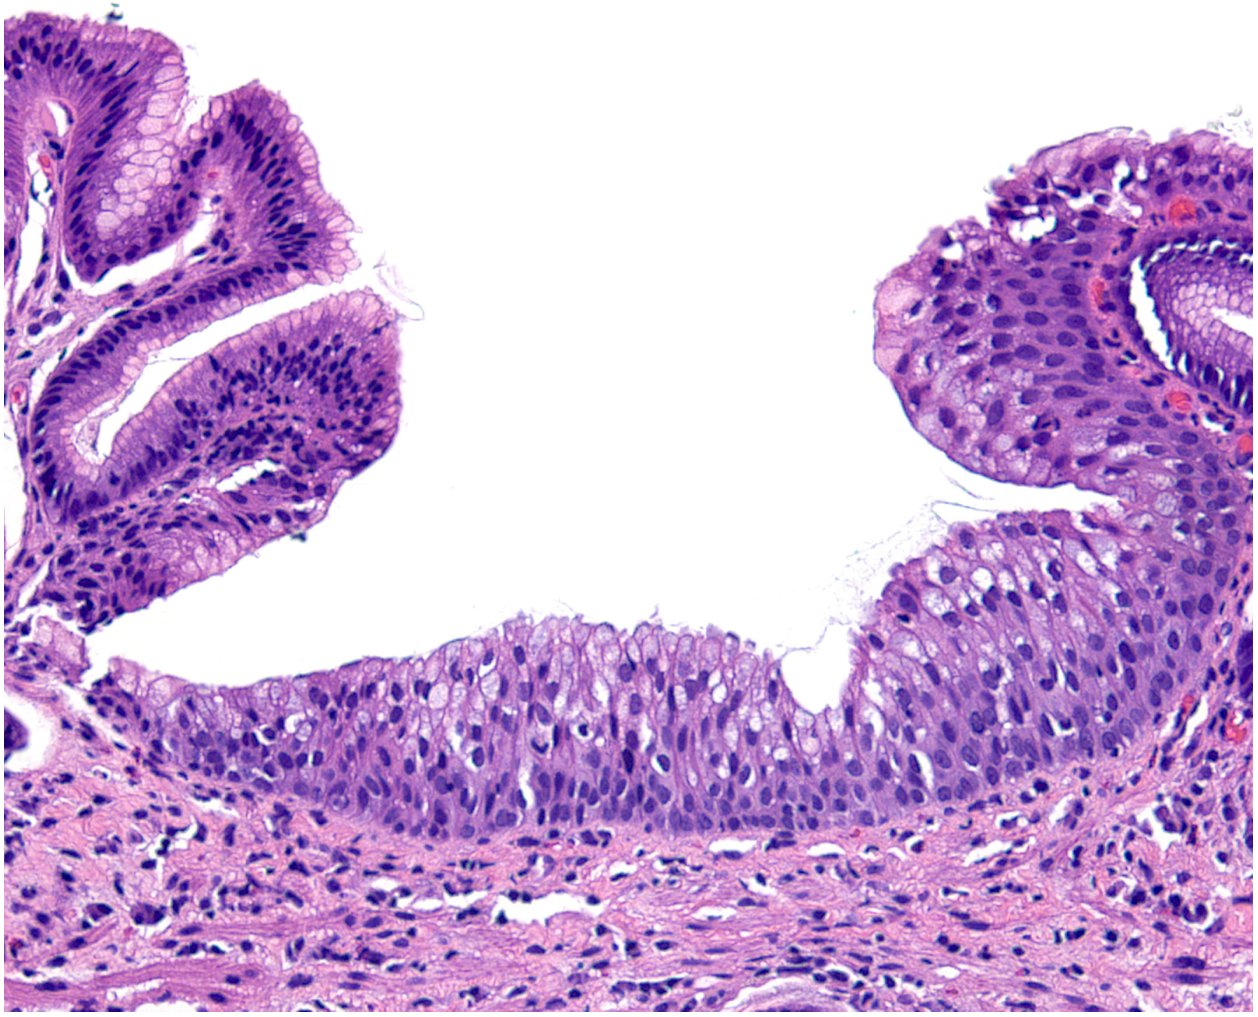

Supplement: NIHMS1529114-supplement-1.pdf [file NIHMS1529114-supplement-1.pdf]
